# Supplementary material for: Context Modulates Attention to Faces in Dynamic Social Scenes in Children and Adults with Autism Spectrum Disorder
Source: Springer Nature journal article supplement (doi:10.1007/s10803-021-05279-z), 2021-10-08
Supplement: MOESM1 [file 19742450]

## Supplementary Information

**Supplementary Table 1.** The order of episodes of different stimulus conditions in each video stimulus.

| Episode no. | Video with a <i>female</i> actor |                    | Video with a <i>male</i> actor |                    |
|-------------|----------------------------------|--------------------|--------------------------------|--------------------|
|             | Time interval, sec               | Stimulus condition | Time interval, sec             | Stimulus condition |
| 1           | 00 – 22                          | Activity           | 00–29                          | Activity           |
| 2           | 22 – 27                          | Dyadic Bid         | 29–36                          | Dyadic Bid         |
| 3           | 27 – 31                          | Activity           | 36–40                          | Activity           |
| 4           | 31 – 40                          | Joint Attention    | 40–46                          | Joint Attention    |
| 5           | 40 – 46                          | Activity           | 46–50                          | Dyadic Bid         |
| 6           | 46 – 49                          | Dyadic Bid         | 50–57                          | Activity           |
| 7           | 45 – 55                          | Activity           | 57–62                          | Moving Toy         |
| 8           | 55 – 60                          | Moving Toy         | 62–67                          | Dyadic Bid         |
| 9           | 60 – 67                          | Activity           | 67–90                          | Activity           |
| 10          | 67 – 73                          | Dyadic Bid         | -                              | -                  |

*Time intervals are aligned with respect to stimulus onset*

**Supplementary Table 2.** Fixed effects in the model of % *Valid Time*.

| Fixed effect                           | $\chi^2$ -statistic | df | <i>P</i> -value                       |
|----------------------------------------|---------------------|----|---------------------------------------|
| Intercept                              | 1076.04             | 1  | < <b><math>10^{-15}</math></b>        |
| Participant group                      | 1.41                | 1  | 0.24                                  |
| Participant's age                      | 2.51                | 1  | 0.11                                  |
| Participant's sex                      | 0.96                | 1  | 0.33                                  |
| Stimulus condition                     | 20.24               | 3  | < <b><math>5 \cdot 10^{-4}</math></b> |
| Stimulus condition x Participant group | 13.68               | 3  | < <b><math>5 \cdot 10^{-3}</math></b> |

*Significance of the fixed effects is tested using the analysis of variance type III sum of squares and the Wald  $\chi^2$  test. P-values below 0.05 are highlighted in bold. df, degrees of freedom*

**Supplementary Table 3.** Post-hoc pair-wise comparisons in the model of % *Valid Time*.

| Comparison                                   | Estimate | SE   | df   | <i>t</i> -statistic | <i>P</i> -value            |
|----------------------------------------------|----------|------|------|---------------------|----------------------------|
| ASD, Activity vs. TD, Activity               | -2.56    | 2.16 | 128  | -1.19               | 0.93                       |
| ASD, Activity vs. ASD, Dyadic Bid            | -1.09    | 0.43 | 2502 | -2.54               | 0.18                       |
| ASD, Activity vs. TD, Dyadic Bid             | -5.06    | 2.16 | 128  | -2.35               | 0.28                       |
| ASD, Activity vs. ASD, Joint Attention       | -1.67    | 0.43 | 2502 | -3.89               | < <b>5·10<sup>-3</sup></b> |
| ASD, Activity vs. TD, Joint Attention        | -2.73    | 2.16 | 128  | -1.27               | 0.91                       |
| ASD, Activity vs. ASD, Moving Toy            | -1.67    | 0.43 | 2502 | -3.90               | < <b>5·10<sup>-3</sup></b> |
| ASD, Activity vs. TD, Moving Toy             | -4.63    | 2.16 | 128  | -2.15               | 0.39                       |
| TD, Activity vs. ASD, Dyadic Bid             | 1.47     | 2.16 | 128  | 0.68                | 1.00                       |
| TD, Activity vs. TD, Dyadic Bid              | -2.50    | 0.68 | 2502 | -3.71               | <b>0.01</b>                |
| TD, Activity vs. ASD, Joint Attention        | 0.89     | 2.16 | 128  | 0.41                | 1.00                       |
| TD, Activity vs. TD, Joint Attention         | -0.17    | 0.68 | 2502 | -0.26               | 1.00                       |
| TD, Activity vs. ASD, Moving Toy             | 0.89     | 2.16 | 128  | 0.41                | 1.00                       |
| TD, Activity vs. TD, Moving Toy              | -2.07    | 0.68 | 2502 | -3.07               | <b>0.04</b>                |
| ASD, Dyadic Bid vs. TD, Dyadic Bid           | -3.97    | 2.16 | 128  | -1.84               | 0.59                       |
| ASD, Dyadic Bid vs. ASD, Joint Attention     | -0.58    | 0.43 | 2502 | -1.35               | 0.88                       |
| ASD, Dyadic Bid vs. TD, Joint Attention      | -1.64    | 2.16 | 128  | -0.76               | 0.99                       |
| ASD, Dyadic Bid vs. ASD, Moving Toy          | -0.58    | 0.43 | 2502 | -1.36               | 0.88                       |
| ASD, Dyadic Bid vs. TD, Moving Toy           | -3.54    | 2.16 | 128  | -1.64               | 0.72                       |
| TD, Dyadic Bid vs. ASD, Joint Attention      | 3.39     | 2.16 | 128  | 1.57                | 0.76                       |
| TD, Dyadic Bid vs. TD, Joint Attention       | 2.33     | 0.68 | 2502 | 3.45                | <b>0.01</b>                |
| TD, Dyadic Bid vs. ASD, Moving Toy           | 3.39     | 2.16 | 128  | 1.57                | 0.77                       |
| TD, Dyadic Bid vs. TD, Moving Toy            | 0.43     | 0.68 | 2502 | 0.64                | 1.00                       |
| ASD, Joint Attention vs. TD, Joint Attention | -1.06    | 2.16 | 128  | -0.49               | 1.00                       |
| ASD, Joint Attention vs. ASD, Moving Toy     | -0.002   | 0.43 | 2502 | -0.01               | 1.00                       |
| ASD, Joint Attention vs. TD, Moving Toy      | -2.96    | 2.16 | 128  | -1.38               | 0.87                       |
| TD, Joint Attention vs. ASD, Moving Toy      | 1.06     | 2.16 | 128  | 0.49                | 1.00                       |
| TD, Joint Attention vs. TD, Moving Toy       | -1.90    | 0.68 | 2502 | -2.82               | 0.09                       |
| ASD, Moving Toy vs. TD, Moving Toy           | -2.96    | 2.16 | 128  | -1.37               | 0.87                       |

*ASD, autism spectrum disorder; df, degrees of freedom; SE, standard error; TD, typically developing*

**Supplementary Table 4.** Least-squares mean estimates and 95% two-sided confidence intervals for different levels of the categorical factors in the model of % *Valid Time*.

| Group | Condition |           | Activity  | Dyadic Bid | Joint Attention | Moving Toy |
|-------|-----------|-----------|-----------|------------|-----------------|------------|
|       | n         | Statistic |           |            |                 |            |
| ASD   | 94        | Mean      | 85.3      | 86.4       | 87.0            | 87.0       |
|       | 94        | CI        | 82.9–87.8 | 84.0–88.9  | 84.5–89.4       | 84.5–89.5  |
| TD    | 38        | Mean      | 87.9      | 90.4       | 88.1            | 90.0       |
|       | 38        | CI        | 84.2–91.5 | 86.7–94.1  | 84.4–91.7       | 86.3–93.6  |

*'n' indicates the number of participants. ASD, autism spectrum disorder; CI, confidence interval; TD, typically developing*

**Supplementary Table 5.** Fixed effects in the models of % *looking time* for different stimulus conditions incorporating the five regions of interest.

| Stimulus condition | Fixed effect                           | $\chi^2$ -statistic | df | P-value                               |
|--------------------|----------------------------------------|---------------------|----|---------------------------------------|
| Activity           | Intercept                              | 16.50               | 1  | < <b><math>10^{-4}</math></b>         |
|                    | Participant group                      | 0.33                | 1  | 0.56                                  |
|                    | Participant's age                      | 0.00                | 1  | 1.00                                  |
|                    | Participant's sex                      | 0.00                | 1  | 1.00                                  |
|                    | Region-of-interest                     | 3342.93             | 4  | < <b><math>10^{-15}</math></b>        |
|                    | Region-of-interest x Participant group | 15.33               | 4  | < <b><math>5 \cdot 10^{-3}</math></b> |
| Dyadic Bid         | Intercept                              | 7.50                | 1  | <b>0.01</b>                           |
|                    | Participant group                      | 0.42                | 1  | 0.52                                  |
|                    | Participant's age                      | 0.00                | 1  | 1.00                                  |
|                    | Participant's sex                      | 0.00                | 1  | 1.00                                  |
|                    | Region-of-interest                     | 1532.74             | 4  | < <b><math>10^{-15}</math></b>        |
|                    | Region-of-interest x Participant group | 11.24               | 4  | <b>0.02</b>                           |
| Joint Attention    | Intercept                              | 12.95               | 1  | < <b><math>5 \cdot 10^{-4}</math></b> |
|                    | Participant group                      | 0.11                | 1  | 0.74                                  |
|                    | Participant's age                      | 0.00                | 1  | 1.00                                  |
|                    | Participant's sex                      | 0.00                | 1  | 1.00                                  |
|                    | Region-of-interest                     | 766.15              | 1  | < <b><math>10^{-15}</math></b>        |
|                    | Region-of-interest x Participant group | 28.45               | 4  | < <b><math>10^{-4}</math></b>         |
| Moving Toy         | Intercept                              | 3.67                | 1  | 0.06                                  |
|                    | Participant group                      | 0.33                | 1  | 0.57                                  |
|                    | Participant's age                      | 0.00                | 1  | 1.00                                  |
|                    | Participant's sex                      | 0.00                | 1  | 1.00                                  |
|                    | Region-of-interest                     | 1165.11             | 4  | < <b><math>10^{-15}</math></b>        |
|                    | Region-of-interest x Participant group | 1.05                | 4  | 0.90                                  |

*The data of each stimulus condition are modelled separately. The same five regions of interest are analyzed as those presented in **Figure 2**. Significance of the fixed effects is assessed using the analysis of variance type III sum of squares and the Wald  $\chi^2$  test. P-values below 0.05 are in bold. df, degrees of freedom*

**Supplementary Table 6.** Least-squares mean estimates and 95% two-sided confidence intervals for different levels of the categorical factors in the models of % *looking time* for different stimulus conditions incorporating the five regions of interest.

| Condition          | Group           | ROI<br>Statistic | Background         | Body               | Hands/<br>Activity   | Face                 | Toys                 |
|--------------------|-----------------|------------------|--------------------|--------------------|----------------------|----------------------|----------------------|
| Activity           | ASD<br>(n = 94) | Mean<br>CI       | 3.71<br>2.38–5.04  | 3.89<br>2.56–5.22  | 47.93<br>46.61–49.26 | 30.72<br>29.39–32.05 | 13.74<br>12.41–15.07 |
|                    | TD<br>(n = 38)  | Mean<br>CI       | 2.99<br>0.93–5.06  | 3.56<br>1.50–5.63  | 46.31<br>44.24–48.37 | 34.91<br>32.85–36.98 | 12.20<br>10.13–14.27 |
| Dyadic<br>Bid      | ASD<br>(n = 94) | Mean<br>CI       | 3.95<br>1.85–6.06  | 4.61<br>2.51–6.72  | 33.78<br>31.67–35.88 | 49.26<br>47.16–51.36 | 8.38<br>6.28–10.49   |
|                    | TD<br>(n = 38)  | Mean<br>CI       | 2.69<br>–0.59–5.96 | 3.90<br>0.63–7.17  | 39.39<br>36.12–42.66 | 48.58<br>45.31–51.85 | 5.44<br>2.17–8.71    |
| Joint<br>Attention | ASD<br>(n = 94) | Mean<br>CI       | 5.38<br>3.20–7.56  | 3.16<br>0.99–5.34  | 36.51<br>34.33–38.69 | 24.53<br>22.35–26.71 | 30.40<br>28.22–32.58 |
|                    | TD<br>(n = 38)  | Mean<br>CI       | 4.71<br>1.32–8.09  | 3.07<br>–0.32–6.46 | 34.63<br>31.25–38.02 | 33.20<br>29.81–36.59 | 24.35<br>20.96–27.74 |
| Moving<br>Toy      | ASD<br>(n = 94) | Mean<br>CI       | 3.39<br>0.82–5.97  | 2.74<br>0.16–5.31  | 12.91<br>10.33–15.49 | 25.51<br>22.93–28.09 | 55.44<br>52.86–58.01 |
|                    | TD<br>(n = 38)  | Mean<br>CI       | 2.02<br>–1.99–6.03 | 3.10<br>–0.91–7.11 | 14.00<br>10.00–18.01 | 26.65<br>22.64–30.65 | 54.23<br>50.22–58.23 |

*The data are obtained using the same linear–mixed effects models as those listed in Supplementary Table 5. ‘n’ indicates the number of participants. ASD, autism spectrum disorder; CI, confidence interval; ROI, region-of-interest; TD, typically developing*

**Supplementary Table 7.** Fixed effects in the models of % *looking time* for different stimulus conditions incorporating the core features of faces as regions of interest.

| Stimulus condition | Fixed effect                           | $\chi^2$ -statistic | df | <i>P</i> -value           |
|--------------------|----------------------------------------|---------------------|----|---------------------------|
| Activity           | Intercept                              | 42.61               | 1  | < <b>10<sup>-10</sup></b> |
|                    | Participant group                      | 0.78                | 1  | 0.38                      |
|                    | Participant's age                      | 1.18                | 1  | 0.28                      |
|                    | Participant's sex                      | 0.00                | 1  | 0.99                      |
|                    | Region-of-interest                     | 1209.00             | 2  | < <b>10<sup>-15</sup></b> |
|                    | Region-of-interest x Participant group | 9.70                | 2  | <b>0.01</b>               |
| Dyadic Bid         | Intercept                              | 136.01              | 1  | < <b>10<sup>-15</sup></b> |
|                    | Participant group                      | 0.05                | 1  | 0.83                      |
|                    | Participant's age                      | 0.05                | 1  | 0.83                      |
|                    | Participant's sex                      | 2.28                | 1  | 0.13                      |
|                    | Region-of-interest                     | 151.54              | 2  | < <b>10<sup>-15</sup></b> |
|                    | Region-of-interest x Participant group | 1.39                | 2  | 0.50                      |
| Joint Attention    | Intercept                              | 54.76               | 1  | < <b>10<sup>-12</sup></b> |
|                    | Participant group                      | 3.62                | 1  | 0.06                      |
|                    | Participant's age                      | 0.63                | 1  | 0.43                      |
|                    | Participant's sex                      | 0.03                | 1  | 0.86                      |
|                    | Region-of-interest                     | 22.18               | 2  | < <b>10<sup>-4</sup></b>  |
|                    | Region-of-interest x Participant group | 1.64                | 2  | 0.44                      |
| Moving Toy         | Intercept                              | 43.63               | 1  | < <b>10<sup>-10</sup></b> |
|                    | Participant group                      | 0.94                | 1  | 0.33                      |
|                    | Participant's age                      | 0.23                | 1  | 0.63                      |
|                    | Participant's sex                      | 0.03                | 1  | 0.86                      |
|                    | Region-of-interest                     | 38.68               | 2  | < <b>10<sup>-8</sup></b>  |
|                    | Region-of-interest x Participant group | 2.68                | 2  | 0.26                      |

*The data of each stimulus conditions are modelled separately. The same three regions of interest are analyzed as those presented in **Figure 3**. Significance of the fixed effects is assessed using the analysis of variance type III sum of squares and the Wald  $\chi^2$  test. *P*-values below 0.05 are in bold. df, degrees of freedom*

**Supplementary Table 8.** Least-squares mean estimates and 95% two-sided confidence intervals for different levels of the categorical factors in the models of % *looking time* for different stimulus conditions incorporating the core features of faces as regions of interest.

| Condition          | Group           | ROI        | Eyes                 | Mouth                | Hair               |
|--------------------|-----------------|------------|----------------------|----------------------|--------------------|
|                    |                 | Statistic  |                      |                      |                    |
| Activity           | ASD<br>(n = 94) | Mean<br>CI | 4.89<br>3.84–5.93    | 24.70<br>23.65–25.75 | 1.08<br>0.03–2.13  |
|                    | TD<br>(n = 38)  | Mean<br>CI | 5.74<br>4.12–7.36    | 28.53<br>26.91–30.14 | 0.80<br>–0.82–2.42 |
| Dyadic<br>Bid      | ASD<br>(n = 94) | Mean<br>CI | 24.84<br>22.24–27.43 | 19.51<br>16.92–22.10 | 3.52<br>0.93–6.11  |
|                    | TD<br>(n = 38)  | Mean<br>CI | 25.35<br>21.35–29.36 | 20.97<br>16.97–24.98 | 1.18<br>–2.82–5.18 |
| Joint<br>Attention | ASD<br>(n = 94) | Mean<br>CI | 11.53<br>9.62–13.45  | 7.89<br>5.98–9.80    | 5.30<br>3.39–7.22  |
|                    | TD<br>(n = 38)  | Mean<br>CI | 14.88<br>11.92–17.83 | 11.91<br>8.96–14.87  | 6.31<br>3.35–9.26  |
| Moving<br>Toy      | ASD<br>(n = 94) | Mean<br>CI | 10.53<br>8.55–12.52  | 11.48<br>9.50–13.47  | 3.67<br>1.68–5.65  |
|                    | TD<br>(n = 38)  | Mean<br>CI | 12.29<br>9.24–15.35  | 12.74<br>9.68–15.80  | 1.58<br>–1.48–4.64 |

*The data are obtained using the same linear-mixed effects models as those listed in Supplementary Table 7. ‘n’ indicates the number of participants. ASD, autism spectrum disorder; CI, confidence interval; ROI, region-of-interest; TD, typically developing.*



**Supplementary Table 9.** Spearman correlations between % *Valid Time*, % *looking time* for different regions of interest and the KBIT-2 IQ composite score in groups of the individuals with ASD with varying levels of IQ.

| Stimulus condition | Activity | Dyadic Bid | Joint Attention | Moving Toy          |               |               |
|--------------------|----------|------------|-----------------|---------------------|---------------|---------------|
| Region-of-interest | IQ range | n          |                 |                     |               |               |
| % Valid Time       | all      | 94         | -0.029 (0.78)   | 0.089 (0.39)        | 0.106 (0.31)  | -0.056 (0.59) |
|                    | 60–84    | 21         | 0.219 (0.34)    | 0.101 (0.66)        | 0.386 (0.08)  | 0.417 (0.06)  |
|                    | 85–115   | 54         | 0.011 (0.93)    | <b>0.280 (0.04)</b> | 0.094 (0.50)  | 0.028 (0.84)  |
|                    | 116–136  | 19         | 0.063 (0.80)    | 0.219 (0.37)        | -0.032 (0.90) | 0.116 (0.64)  |
| Background         | all      | 94         | 0.159 (0.13)    | 0.145 (0.16)        | -0.028 (0.79) | 0.043 (0.68)  |
|                    | 60–84    | 21         | 0.138 (0.55)    | 0.032 (0.89)        | 0.056 (0.81)  | 0.226 (0.32)  |
|                    | 85–115   | 54         | -0.215 (0.12)   | -0.041 (0.77)       | -0.166 (0.23) | -0.162 (0.24) |
|                    | 116–136  | 19         | 0.301 (0.21)    | 0.074 (0.76)        | 0.277 (0.25)  | 0.197 (0.42)  |
| Body               | all      | 94         | -0.169 (0.10)   | -0.081 (0.44)       | -0.063 (0.55) | 0.010 (0.92)  |
|                    | 60–84    | 21         | -0.197 (0.39)   | 0.092 (0.69)        | -0.126 (0.59) | 0.130 (0.58)  |
|                    | 85–115   | 54         | 0.002 (0.99)    | -0.187 (0.18)       | -0.001 (0.99) | 0.102 (0.46)  |
|                    | 116–136  | 19         | 0.358 (0.13)    | -0.003 (0.99)       | 0.054 (0.83)  | 0.410 (0.08)  |
| Hands/Activity     | all      | 94         | 0.028 (0.79)    | -0.099 (0.34)       | 0.025 (0.81)  | -0.153 (0.14) |
|                    | 60–84    | 21         | -0.107 (0.65)   | -0.172 (0.46)       | -0.141 (0.54) | -0.178 (0.44) |
|                    | 85–115   | 54         | 0.213 (0.12)    | 0.163 (0.24)        | 0.157 (0.26)  | 0.165 (0.23)  |
|                    | 116–136  | 19         | -0.254 (0.29)   | -0.124 (0.61)       | 0.082 (0.74)  | 0.139 (0.57)  |
| Face               | all      | 94         | 0.032 (0.76)    | 0.032 (0.76)        | 0.103 (0.32)  | -0.018 (0.86) |
|                    | 60–84    | 21         | -0.021 (0.93)   | 0.111 (0.63)        | -0.046 (0.84) | -0.351 (0.12) |
|                    | 85–115   | 54         | -0.026 (0.85)   | -0.179 (0.20)       | 0.070 (0.62)  | -0.102 (0.47) |
|                    | 116–136  | 19         | 0.282 (0.24)    | 0.058 (0.81)        | -0.123 (0.62) | 0.072 (0.77)  |
| Eyes               | all      | 94         | -0.061 (0.56)   | -0.055 (0.60)       | 0.016 (0.88)  | -0.053 (0.61) |
|                    | 60–84    | 21         | -0.114 (0.62)   | -0.077 (0.74)       | 0.320 (0.16)  | -0.335 (0.14) |
|                    | 85–115   | 54         | -0.244 (0.08)   | -0.232 (0.09)       | -0.100 (0.47) | -0.084 (0.54) |
|                    | 116–136  | 19         | -0.053 (0.83)   | -0.143 (0.56)       | -0.123 (0.62) | -0.112 (0.65) |
| Mouth              | all      | 94         | 0.015 (0.89)    | 0.049 (0.64)        | 0.033 (0.75)  | -0.053 (0.61) |
|                    | 60–84    | 21         | 0.275 (0.23)    | 0.347 (0.12)        | -0.057 (0.81) | -0.049 (0.83) |
|                    | 85–115   | 54         | 0.092 (0.51)    | 0.222 (0.11)        | 0.245 (0.07)  | -0.004 (0.98) |
|                    | 116–136  | 19         | 0.270 (0.26)    | 0.294 (0.22)        | -0.216 (0.37) | 0.070 (0.77)  |
| Hair               | all      | 94         | 0.068 (0.52)    | 0.062 (0.55)        | 0.148 (0.16)  | 0.050 (0.64)  |

|      |         |    |               |               |               |                     |
|------|---------|----|---------------|---------------|---------------|---------------------|
|      | 60–84   | 21 | –0.061 (0.79) | 0.147 (0.52)  | –0.213 (0.36) | 0.148 (0.52)        |
|      | 85–115  | 54 | –0.127 (0.36) | –0.135 (0.33) | –0.028 (0.84) | –0.243 (0.08)       |
|      | 116–136 | 19 | 0.154 (0.53)  | 0.212 (0.38)  | 0.229 (0.35)  | 0.147 (0.55)        |
| Toys | all     | 94 | 0.017 (0.87)  | 0.041 (0.69)  | –0.058 (0.58) | 0.074 (0.48)        |
|      | 60–84   | 21 | 0.197 (0.39)  | –0.147 (0.52) | –0.165 (0.47) | <b>0.482 (0.03)</b> |
|      | 85–115  | 54 | –0.135 (0.33) | 0.011 (0.93)  | –0.117 (0.40) | –0.040 (0.78)       |
|      | 116–136 | 19 | –0.363 (0.13) | –0.042 (0.86) | –0.061 (0.81) | –0.261 (0.28)       |

*The data are presented for each stimulus condition and region-of-interest separately. Cells contain Spearman correlation coefficients, with the corresponding two-sided P-values being provided in parentheses. Cells with P-values below 0.05 are highlighted in bold (see also **Supplementary Figure 2**). ‘all’ in column ‘IQ range’ refers to the whole ASD sample regardless of IQ level. ‘n’ indicates the number of participants. ASD, autism spectrum disorder; IQ, intelligence quotient; KBIT-2, Kaufman Brief Intelligence Test-2.*

**Supplementary Table 10.** Correlations between % *Valid Time*, % *looking time* for different regions of interest and severity of ASD symptoms.

| Region-of-interest                                                  |                 | % Valid Time         | Background          | Body                | Hands/Activity | Face                | Toys                            |
|---------------------------------------------------------------------|-----------------|----------------------|---------------------|---------------------|----------------|---------------------|---------------------------------|
| <b>ASD symptom</b>                                                  |                 |                      |                     |                     |                |                     |                                 |
| <b>Condition</b>                                                    |                 |                      |                     |                     |                |                     |                                 |
| <b>Autism Behavior Inventory (n = 93)</b>                           |                 |                      |                     |                     |                |                     |                                 |
| Core ASD symptom scale score (total score)                          | Activity        | -0.205 (0.05)        | 0.147 (0.17)        | 0.179 (0.09)        | -0.081 (0.45)  | 0.067 (0.53)        | -0.081 (0.45)                   |
|                                                                     | Dyadic Bid      | -0.146 (0.17)        | 0.117 (0.27)        | 0.014 (0.89)        | 0.013 (0.90)   | -0.056 (0.60)       | -0.016 (0.88)                   |
|                                                                     | Joint Attention | <b>-0.250 (0.02)</b> | 0.158 (0.14)        | 0.080 (0.45)        | -0.023 (0.83)  | 0.190 (0.07)        | <b>-0.261 (0.01)</b>            |
|                                                                     | Moving Toy      | <b>-0.225 (0.03)</b> | <b>0.265 (0.01)</b> | -0.020 (0.85)       | 0.027 (0.80)   | 0.054 (0.61)        | -0.148 (0.16)                   |
| Challenging behavior                                                | Activity        | -0.178 (0.09)        | -0.008 (0.94)       | 0.129 (0.23)        | -0.008 (0.94)  | 0.067 (0.53)        | -0.131 (0.22)                   |
|                                                                     | Dyadic Bid      | -0.043 (0.69)        | -0.080 (0.45)       | 0.186 (0.08)        | -0.099 (0.35)  | 0.078 (0.46)        | -0.054 (0.61)                   |
|                                                                     | Joint Attention | -0.092 (0.39)        | -0.054 (0.61)       | 0.144 (0.18)        | -0.010 (0.93)  | 0.045 (0.67)        | -0.110 (0.30)                   |
|                                                                     | Moving Toy      | 0.025 (0.82)         | 0.060 (0.57)        | -0.046 (0.67)       | 0.058 (0.59)   | 0.019 (0.86)        | -0.018 (0.87)                   |
| Mental health                                                       | Activity        | -0.148 (0.16)        | 0.001 (0.99)        | 0.085 (0.42)        | -0.068 (0.52)  | 0.075 (0.48)        | -0.083 (0.44)                   |
|                                                                     | Dyadic Bid      | 0.013 (0.90)         | -0.057 (0.59)       | -0.092 (0.39)       | 0.032 (0.76)   | 0.006 (0.95)        | -0.101 (0.34)                   |
|                                                                     | Joint Attention | -0.119 (0.26)        | -0.049 (0.65)       | 0.134 (0.21)        | 0.034 (0.75)   | 0.056 (0.60)        | -0.121 (0.25)                   |
|                                                                     | Moving Toy      | -0.078 (0.46)        | 0.082 (0.44)        | -0.011 (0.92)       | 0.104 (0.33)   | -0.084 (0.43)       | -0.003 (0.98)                   |
| Restrictive repetitive behaviors                                    | Activity        | -0.139 (0.19)        | 0.060 (0.58)        | 0.134 (0.21)        | -0.083 (0.44)  | 0.056 (0.60)        | -0.077 (0.47)                   |
|                                                                     | Dyadic Bid      | -0.089 (0.40)        | 0.018 (0.87)        | -0.078 (0.46)       | -0.051 (0.63)  | 0.011 (0.92)        | 0.003 (0.98)                    |
|                                                                     | Joint Attention | -0.187 (0.08)        | 0.011 (0.92)        | 0.024 (0.82)        | -0.044 (0.68)  | 0.145 (0.17)        | -0.165 (0.12)                   |
|                                                                     | Moving Toy      | -0.154 (0.15)        | 0.166 (0.12)        | -0.023 (0.83)       | -0.015 (0.89)  | 0.058 (0.59)        | -0.095 (0.37)                   |
| Self-regulation                                                     | Activity        | -0.023 (0.83)        | -0.042 (0.69)       | 0.056 (0.60)        | -0.050 (0.64)  | 0.083 (0.44)        | -0.095 (0.37)                   |
|                                                                     | Dyadic Bid      | 0.121 (0.25)         | -0.151 (0.16)       | -0.040 (0.71)       | 0.123 (0.25)   | -0.096 (0.37)       | 0.058 (0.59)                    |
|                                                                     | Joint Attention | -0.106 (0.32)        | -0.139 (0.19)       | 0.012 (0.91)        | 0.106 (0.32)   | -0.092 (0.39)       | 0.017 (0.87)                    |
|                                                                     | Moving Toy      | -0.018 (0.87)        | -0.103 (0.34)       | 0.121 (0.25)        | 0.055 (0.60)   | 0.095 (0.37)        | -0.136 (0.20)                   |
| Social communication                                                | Activity        | <b>-0.217 (0.04)</b> | 0.147 (0.17)        | 0.144 (0.17)        | -0.042 (0.69)  | 0.070 (0.51)        | -0.084 (0.43)                   |
|                                                                     | Dyadic Bid      | -0.116 (0.27)        | 0.163 (0.12)        | 0.129 (0.23)        | 0.063 (0.55)   | -0.088 (0.41)       | -0.016 (0.88)                   |
|                                                                     | Joint Attention | <b>-0.237 (0.02)</b> | <b>0.245 (0.02)</b> | 0.150 (0.16)        | 0.048 (0.65)   | <b>0.209 (0.05)</b> | <b>-0.343 (10<sup>-3</sup>)</b> |
|                                                                     | Moving Toy      | <b>-0.220 (0.04)</b> | <b>0.285 (0.01)</b> | 0.024 (0.83)        | 0.108 (0.31)   | 0.036 (0.74)        | -0.167 (0.12)                   |
| <b>Autism Diagnostic Observation Schedule, 2nd edition (n = 94)</b> |                 |                      |                     |                     |                |                     |                                 |
| Restricted and repetitive behavior                                  | Activity        | 0.101 (0.34)         | -0.030 (0.78)       | -0.104 (0.32)       | -0.103 (0.33)  | 0.104 (0.33)        | 0.106 (0.32)                    |
|                                                                     | Dyadic Bid      | 0.154 (0.14)         | 0.075 (0.48)        | <b>0.266 (0.01)</b> | -0.013 (0.91)  | -0.065 (0.54)       | 0.127 (0.23)                    |
|                                                                     | Joint Attention | -0.042 (0.69)        | -0.085 (0.42)       | 0.034 (0.75)        | -0.138 (0.19)  | 0.014 (0.89)        | 0.109 (0.30)                    |
|                                                                     | Moving Toy      | 0.098 (0.35)         | -0.038 (0.72)       | -0.069 (0.52)       | -0.009 (0.93)  | -0.091 (0.39)       | <b>0.208 (0.05)</b>             |
| Social affect                                                       | Activity        | -0.085 (0.43)        | 0.151 (0.15)        | 0.057 (0.59)        | -0.089 (0.40)  | -0.182 (0.08)       | 0.180 (0.09)                    |
|                                                                     | Dyadic Bid      | -0.122 (0.25)        | <b>0.227 (0.03)</b> | -0.102 (0.34)       | -0.145 (0.17)  | 0.040 (0.71)        | 0.169 (0.11)                    |
|                                                                     | Joint Attention | -0.039 (0.71)        | -0.002 (0.99)       | -0.015 (0.89)       | -0.174 (0.10)  | -0.007 (0.95)       | 0.136 (0.20)                    |
|                                                                     | Moving Toy      | -0.198 (0.06)        | 0.152 (0.15)        | -0.138 (0.19)       | -0.128 (0.23)  | -0.144 (0.17)       | 0.156 (0.14)                    |

*Continued on the following page*

|                                                              | Region-of-interest | % Valid Time  | Background                   | Body                | Hands/Activity       | Face                 | Toys                 |
|--------------------------------------------------------------|--------------------|---------------|------------------------------|---------------------|----------------------|----------------------|----------------------|
| <b>ASD symptom</b>                                           |                    |               |                              |                     |                      |                      |                      |
|                                                              | Condition          |               |                              |                     |                      |                      |                      |
| Total score                                                  | Activity           | -0.076 (0.47) | 0.090 (0.40)                 | 0.006 (0.96)        | -0.122 (0.25)        | -0.133 (0.21)        | 0.193 (0.07)         |
|                                                              | Dyadic Bid         | -0.086 (0.42) | <b>0.227 (0.03)</b>          | -0.018 (0.87)       | -0.173 (0.10)        | -0.001 (0.99)        | <b>0.288 (0.01)</b>  |
|                                                              | Joint Attention    | -0.081 (0.45) | -0.002 (0.98)                | -0.002 (0.98)       | <b>-0.218 (0.04)</b> | -0.047 (0.66)        | 0.177 (0.09)         |
|                                                              | Moving Toy         | -0.141 (0.18) | 0.099 (0.35)                 | -0.167 (0.11)       | -0.106 (0.32)        | <b>-0.222 (0.03)</b> | <b>0.246 (0.02)</b>  |
| <b>Aberrant Behavior Checklist (n = 94)</b>                  |                    |               |                              |                     |                      |                      |                      |
| Hyperactivity non-compliance                                 | Activity           | -0.019 (0.86) | -0.090 (0.40)                | -0.024 (0.82)       | 0.027 (0.80)         | 0.085 (0.42)         | -0.137 (0.19)        |
|                                                              | Dyadic Bid         | 0.098 (0.35)  | -0.159 (0.13)                | 0.012 (0.91)        | 0.156 (0.14)         | -0.106 (0.32)        | -0.026 (0.80)        |
|                                                              | Joint Attention    | -0.093 (0.38) | -0.028 (0.79)                | 0.114 (0.28)        | 0.047 (0.66)         | -0.033 (0.76)        | -0.090 (0.40)        |
|                                                              | Moving Toy         | 0.049 (0.65)  | 0.090 (0.40)                 | 0.097 (0.36)        | 0.138 (0.19)         | 0.089 (0.40)         | -0.186 (0.08)        |
| Inappropriate speech                                         | Activity           | 0.039 (0.72)  | 0.023 (0.83)                 | -0.025 (0.82)       | 0.043 (0.68)         | 0.096 (0.36)         | -0.193 (0.07)        |
|                                                              | Dyadic Bid         | 0.072 (0.50)  | 4 · 10 <sup>-4</sup> (0.996) | -0.013 (0.90)       | 0.056 (0.60)         | -0.030 (0.77)        | -0.027 (0.80)        |
|                                                              | Joint Attention    | -0.097 (0.36) | -0.080 (0.45)                | 0.038 (0.72)        | 0.116 (0.27)         | 0.149 (0.16)         | -0.190 (0.07)        |
|                                                              | Moving Toy         | -0.058 (0.59) | 0.091 (0.39)                 | <b>0.235 (0.02)</b> | 0.136 (0.20)         | 0.103 (0.33)         | <b>-0.214 (0.04)</b> |
| Irritability                                                 | Activity           | -0.098 (0.35) | -0.016 (0.88)                | 0.018 (0.87)        | -0.031 (0.77)        | 0.074 (0.49)         | -0.111 (0.30)        |
|                                                              | Dyadic Bid         | 0.067 (0.53)  | -0.084 (0.43)                | 0.018 (0.87)        | 0.028 (0.79)         | 0.040 (0.71)         | -0.163 (0.12)        |
|                                                              | Joint Attention    | -0.130 (0.22) | 0.006 (0.95)                 | 0.163 (0.12)        | -0.017 (0.87)        | 0.019 (0.86)         | -0.126 (0.24)        |
|                                                              | Moving Toy         | 0.058 (0.59)  | 0.150 (0.16)                 | 0.016 (0.88)        | 0.094 (0.38)         | 0.024 (0.82)         | -0.070 (0.51)        |
| Lethargy social withdrawal                                   | Activity           | -0.029 (0.79) | -0.021 (0.84)                | 0.005 (0.97)        | 0.087 (0.41)         | -0.016 (0.88)        | -0.117 (0.27)        |
|                                                              | Dyadic Bid         | 0.092 (0.38)  | -0.015 (0.89)                | -0.020 (0.85)       | <b>0.212 (0.04)</b>  | -0.130 (0.22)        | -0.002 (0.98)        |
|                                                              | Joint Attention    | -0.119 (0.26) | 0.054 (0.61)                 | 0.154 (0.14)        | 0.061 (0.57)         | 0.120 (0.26)         | <b>-0.271 (0.01)</b> |
|                                                              | Moving Toy         | -0.020 (0.85) | <b>0.213 (0.04)</b>          | 0.042 (0.69)        | 0.162 (0.13)         | -0.106 (0.32)        | -0.048 (0.65)        |
| Stereotypic behavior                                         | Activity           | -0.065 (0.54) | 0.069 (0.52)                 | 0.040 (0.70)        | 0.026 (0.81)         | -0.089 (0.40)        | 0.010 (0.92)         |
|                                                              | Dyadic Bid         | -0.030 (0.78) | 0.107 (0.31)                 | -0.044 (0.68)       | -0.068 (0.52)        | 0.048 (0.65)         | 0.004 (0.97)         |
|                                                              | Joint Attention    | -0.095 (0.37) | -0.021 (0.85)                | -0.028 (0.80)       | -0.012 (0.91)        | 0.056 (0.60)         | -0.093 (0.38)        |
|                                                              | Moving Toy         | -0.096 (0.36) | <b>0.242 (0.02)</b>          | -0.032 (0.77)       | 0.067 (0.53)         | 0.059 (0.58)         | -0.193 (0.07)        |
| <b>Child Adolescent Symptom Inventory – Anxiety (n = 94)</b> |                    |               |                              |                     |                      |                      |                      |
| Total score                                                  | Activity           | -0.050 (0.63) | -0.029 (0.79)                | 0.045 (0.67)        | -0.102 (0.33)        | 0.170 (0.11)         | -0.004 (0.97)        |
|                                                              | Dyadic Bid         | 0.074 (0.49)  | 0.025 (0.81)                 | -0.100 (0.35)       | 0.114 (0.28)         | -0.071 (0.51)        | -0.067 (0.53)        |
|                                                              | Joint Attention    | -0.037 (0.73) | -0.106 (0.32)                | 0.112 (0.29)        | 0.063 (0.55)         | 0.106 (0.32)         | -0.140 (0.18)        |
|                                                              | Moving Toy         | -0.078 (0.46) | 0.160 (0.13)                 | 0.059 (0.58)        | 0.153 (0.15)         | -0.082 (0.44)        | -0.015 (0.89)        |
| <b>Repetitive Behavior Scale – Revised (n = 94)</b>          |                    |               |                              |                     |                      |                      |                      |
| Compulsive behavior                                          | Activity           | 0.020 (0.85)  | -0.081 (0.44)                | -0.030 (0.77)       | -0.129 (0.22)        | 0.087 (0.41)         | 0.116 (0.27)         |
|                                                              | Dyadic Bid         | 0.061 (0.56)  | -0.038 (0.72)                | -0.038 (0.72)       | -0.097 (0.36)        | 0.066 (0.53)         | 0.027 (0.80)         |
|                                                              | Joint Attention    | 0.025 (0.81)  | -0.092 (0.39)                | 0.039 (0.71)        | -0.094 (0.37)        | 0.154 (0.15)         | -0.009 (0.93)        |
|                                                              | Moving Toy         | 0.071 (0.51)  | 0.018 (0.86)                 | -0.150 (0.16)       | -0.134 (0.20)        | 0.099 (0.35)         | 0.007 (0.95)         |

*Continued on the following page.*

|                                               | Region-of-interest | % Valid Time  | Background    | Body          | Hands/Activity | Face                | Toys                 |
|-----------------------------------------------|--------------------|---------------|---------------|---------------|----------------|---------------------|----------------------|
| <b>ASD symptom</b>                            |                    |               |               |               |                |                     |                      |
|                                               | Condition          |               |               |               |                |                     |                      |
| Ritualistic behavior                          | Activity           | -0.098 (0.36) | -0.005 (0.96) | 0.046 (0.67)  | -0.072 (0.50)  | 0.080 (0.45)        | -0.028 (0.79)        |
|                                               | Dyadic Bid         | -0.079 (0.46) | -0.042 (0.69) | -0.045 (0.67) | -0.023 (0.83)  | 0.038 (0.72)        | -0.059 (0.58)        |
|                                               | Joint Attention    | -0.099 (0.35) | -0.130 (0.22) | 0.029 (0.78)  | -0.078 (0.46)  | <b>0.217 (0.04)</b> | -0.072 (0.50)        |
|                                               | Moving Toy         | -0.141 (0.18) | 0.112 (0.29)  | -0.040 (0.71) | 0.073 (0.49)   | 0.062 (0.56)        | -0.074 (0.48)        |
| Restricted behavior                           | Activity           | -0.047 (0.65) | -0.021 (0.85) | -0.039 (0.71) | -0.106 (0.32)  | 0.120 (0.26)        | 0.004 (0.97)         |
|                                               | Dyadic Bid         | 0.030 (0.78)  | 0.103 (0.33)  | -0.052 (0.62) | -0.167 (0.11)  | 0.191 (0.07)        | -0.036 (0.73)        |
|                                               | Joint Attention    | -0.046 (0.66) | 0.058 (0.59)  | 0.043 (0.69)  | -0.123 (0.24)  | <b>0.228 (0.03)</b> | -0.138 (0.19)        |
|                                               | Moving Toy         | -0.030 (0.78) | 0.193 (0.07)  | -0.069 (0.51) | 0.002 (0.98)   | 0.058 (0.58)        | -0.057 (0.59)        |
| Sameness behavior                             | Activity           | -0.022 (0.84) | -0.040 (0.71) | 0.043 (0.68)  | -0.070 (0.51)  | 0.120 (0.26)        | -0.034 (0.75)        |
|                                               | Dyadic Bid         | -0.078 (0.46) | 0.057 (0.59)  | 0.028 (0.79)  | -0.062 (0.56)  | 0.102 (0.34)        | -0.071 (0.50)        |
|                                               | Joint Attention    | -0.118 (0.27) | -0.065 (0.54) | 0.100 (0.35)  | -0.049 (0.64)  | <b>0.231 (0.03)</b> | -0.162 (0.13)        |
|                                               | Moving Toy         | -0.040 (0.70) | 0.135 (0.20)  | -0.035 (0.74) | 0.070 (0.51)   | 0.045 (0.67)        | -0.060 (0.57)        |
| Self-injurious behavior                       | Activity           | 0.065 (0.54)  | -0.111 (0.30) | 0.068 (0.52)  | -0.160 (0.13)  | 0.084 (0.43)        | 0.093 (0.38)         |
|                                               | Dyadic Bid         | 0.037 (0.73)  | -0.096 (0.36) | -0.134 (0.20) | -0.085 (0.42)  | 0.152 (0.15)        | -0.056 (0.60)        |
|                                               | Joint Attention    | 0.029 (0.78)  | -0.163 (0.12) | 0.054 (0.61)  | -0.113 (0.29)  | 0.192 (0.07)        | 0.026 (0.81)         |
|                                               | Moving Toy         | 0.007 (0.94)  | -0.119 (0.26) | 0.036 (0.74)  | -0.071 (0.51)  | 0.167 (0.11)        | -0.064 (0.55)        |
| Stereotyped behavior                          | Activity           | -0.082 (0.44) | 0.073 (0.49)  | -0.019 (0.86) | 0.016 (0.88)   | -0.120 (0.26)       | 0.083 (0.43)         |
|                                               | Dyadic Bid         | -0.101 (0.34) | 0.128 (0.22)  | -0.107 (0.31) | -0.110 (0.30)  | 0.093 (0.38)        | 0.081 (0.45)         |
|                                               | Joint Attention    | -0.200 (0.06) | 0.049 (0.64)  | -0.081 (0.45) | 0.044 (0.68)   | 0.063 (0.55)        | -0.109 (0.30)        |
|                                               | Moving Toy         | -0.078 (0.47) | 0.148 (0.16)  | -0.102 (0.34) | -0.019 (0.86)  | 0.092 (0.38)        | -0.129 (0.22)        |
| Total score                                   | Activity           | -0.084 (0.43) | -0.006 (0.95) | 0.028 (0.79)  | -0.120 (0.26)  | 0.107 (0.32)        | 0.030 (0.78)         |
|                                               | Dyadic Bid         | -0.070 (0.51) | 0.023 (0.83)  | -0.062 (0.56) | -0.098 (0.36)  | 0.114 (0.28)        | -0.027 (0.80)        |
|                                               | Joint Attention    | -0.129 (0.22) | -0.066 (0.53) | 0.023 (0.83)  | -0.085 (0.42)  | <b>0.216 (0.04)</b> | -0.100 (0.35)        |
|                                               | Moving Toy         | -0.067 (0.53) | 0.125 (0.24)  | -0.093 (0.38) | -0.011 (0.92)  | 0.091 (0.39)        | -0.086 (0.42)        |
| <b>Social Responsiveness Scale 2 (n = 93)</b> |                    |               |               |               |                |                     |                      |
| Social awareness                              | Activity           | 0.007 (0.95)  | 0.015 (0.89)  | -0.074 (0.49) | 0.084 (0.43)   | 0.058 (0.58)        | -0.129 (0.22)        |
|                                               | Dyadic Bid         | -0.004 (0.97) | -0.041 (0.70) | -0.048 (0.65) | 0.088 (0.41)   | -0.021 (0.84)       | -0.084 (0.43)        |
|                                               | Joint Attention    | -0.176 (0.10) | 0.173 (0.10)  | 0.074 (0.49)  | 0.141 (0.19)   | 0.002 (0.98)        | -0.201 (0.06)        |
|                                               | Moving Toy         | -0.054 (0.61) | 0.087 (0.42)  | 0.076 (0.48)  | 0.163 (0.13)   | -0.009 (0.94)       | -0.113 (0.29)        |
| Social cognition                              | Activity           | 0.064 (0.55)  | -0.029 (0.79) | -0.113 (0.29) | 0.024 (0.82)   | 0.130 (0.22)        | -0.067 (0.53)        |
|                                               | Dyadic Bid         | 0.104 (0.33)  | -0.018 (0.86) | -0.132 (0.21) | 0.082 (0.44)   | 0.006 (0.95)        | -0.135 (0.20)        |
|                                               | Joint Attention    | -0.124 (0.24) | 0.099 (0.35)  | -0.029 (0.78) | 0.086 (0.42)   | 0.107 (0.32)        | <b>-0.259 (0.01)</b> |
|                                               | Moving Toy         | -0.008 (0.94) | 0.105 (0.33)  | -0.112 (0.29) | 0.051 (0.64)   | 0.033 (0.76)        | -0.103 (0.33)        |

*Continued on the following page.*

|                                              | Region-of-interest | % Valid Time         | Background   | Body          | Hands/Activity | Face                | Toys                              |
|----------------------------------------------|--------------------|----------------------|--------------|---------------|----------------|---------------------|-----------------------------------|
| ASD symptom                                  | Condition          |                      |              |               |                |                     |                                   |
| Social communication                         | Activity           | -0.080 (0.45)        | 0.005 (0.96) | -0.098 (0.36) | 0.062 (0.56)   | 0.029 (0.79)        | -0.126 (0.24)                     |
|                                              | Dyadic Bid         | 0.004 (0.97)         | 0.030 (0.78) | -0.127 (0.23) | 0.044 (0.68)   | 0.036 (0.74)        | -0.109 (0.31)                     |
|                                              | Joint Attention    | <b>-0.215 (0.04)</b> | 0.124 (0.24) | 0.108 (0.31)  | 0.119 (0.27)   | 0.052 (0.63)        | <b>-0.273 (0.01)</b>              |
|                                              | Moving Toy         | -0.112 (0.29)        | 0.179 (0.09) | 0.029 (0.78)  | 0.170 (0.11)   | -0.080 (0.45)       | -0.084 (0.43)                     |
| Social motivation                            | Activity           | -0.061 (0.57)        | 0.018 (0.87) | 0.043 (0.68)  | -0.005 (0.97)  | 0.131 (0.22)        | -0.088 (0.41)                     |
|                                              | Dyadic Bid         | 0.056 (0.60)         | 0.112 (0.29) | -0.169 (0.11) | 0.119 (0.26)   | 0.010 (0.92)        | -0.074 (0.49)                     |
|                                              | Joint Attention    | -0.058 (0.59)        | 0.024 (0.82) | 0.175 (0.10)  | 0.084 (0.43)   | <b>0.284 (0.01)</b> | <b>-0.352 (10<sup>-3</sup>)</b>   |
|                                              | Moving Toy         | -0.084 (0.43)        | 0.148 (0.16) | 0.005 (0.96)  | 0.104 (0.33)   | 0.003 (0.98)        | -0.113 (0.29)                     |
| Restricted interests and repetitive behavior | Activity           | 0.015 (0.89)         | 0.002 (0.99) | 0.031 (0.77)  | -0.059 (0.58)  | 0.057 (0.59)        | -0.014 (0.90)                     |
|                                              | Dyadic Bid         | 0.108 (0.31)         | 0.013 (0.90) | -0.110 (0.30) | -0.004 (0.97)  | 0.033 (0.76)        | -0.087 (0.42)                     |
|                                              | Joint Attention    | -0.134 (0.21)        | 0.026 (0.81) | 0.102 (0.38)  | 0.020 (0.85)   | 0.118 (0.27)        | <b>-0.215 (0.04)</b>              |
|                                              | Moving Toy         | -0.042 (0.69)        | 0.079 (0.46) | 0.005 (0.96)  | 0.049 (0.65)   | 0.007 (0.95)        | -0.071 (0.51)                     |
| Social communication and interaction         | Activity           | -0.046 (0.66)        | 0.005 (0.96) | -0.065 (0.54) | 0.055 (0.61)   | 0.067 (0.53)        | -0.115 (0.28)                     |
|                                              | Dyadic Bid         | 0.026 (0.81)         | 0.040 (0.71) | -0.153 (0.15) | 0.095 (0.37)   | 0.010 (0.93)        | -0.124 (0.24)                     |
|                                              | Joint Attention    | -0.177 (0.09)        | 0.117 (0.27) | 0.090 (0.40)  | 0.109 (0.31)   | 0.107 (0.32)        | <b>-0.295 (5·10<sup>-3</sup>)</b> |
|                                              | Moving Toy         | -0.091 (0.39)        | 0.158 (0.14) | 0.007 (0.94)  | 0.142 (0.18)   | -0.020 (0.85)       | -0.124 (0.24)                     |
| Total score                                  | Activity           | -0.032 (0.76)        | 0.005 (0.96) | -0.053 (0.62) | 0.015 (0.89)   | 0.076 (0.47)        | -0.082 (0.44)                     |
|                                              | Dyadic Bid         | 0.038 (0.72)         | 0.030 (0.78) | -0.141 (0.18) | 0.057 (0.59)   | 0.030 (0.78)        | -0.116 (0.28)                     |
|                                              | Joint Attention    | -0.175 (0.10)        | 0.098 (0.36) | 0.086 (0.42)  | 0.075 (0.48)   | 0.126 (0.24)        | <b>-0.283 (0.01)</b>              |
|                                              | Moving Toy         | -0.081 (0.45)        | 0.136 (0.20) | -0.001 (0.99) | 0.105 (0.33)   | -0.019 (0.86)       | -0.099 (0.35)                     |

*The data are presented for each behavior rating scale, ASD symptom, stimulus condition and region-of-interest separately. Cells contain Spearman partial correlation coefficients along with the corresponding two-sided P-values in parentheses. The correlation coefficients are computed on the data of all individuals with ASD with participant's age, sex and the KBIT-2 IQ composite score being used as covariates. Cells with P-values below 0.05 are highlighted in bold. 'n' indicates the number of participants. ASD, autism spectrum disorder; IQ, intelligence quotient; KBIT-2, Kaufman Brief Intelligence Test-2.*

**Supplementary Table 11.** Comparison of participants with ASD that were included in analysis versus those excluded due to technical or calibration failures.

| Scale                                               | Included in analysis | n  | Total score |                    |              |                                          |
|-----------------------------------------------------|----------------------|----|-------------|--------------------|--------------|------------------------------------------|
|                                                     |                      |    | Mean        | Standard deviation | Range        | Kolmogorov-Smirnov test, <i>P</i> -value |
| Autism Behavior Inventory                           | Yes                  | 94 | 1.9         | 0.8                | 0.3 – 4.6    | 0.18                                     |
|                                                     | No                   | 42 | 2.1         | 0.8                | 0.1 – 3.9    |                                          |
| Autism Diagnostic Observation Schedule, 2nd edition | Yes                  | 94 | 7.5         | 1.7                | 4.0 – 10.0   | 0.91                                     |
|                                                     | No                   | 42 | 7.8         | 1.8                | 4.0 – 10.0   |                                          |
| Child Adolescent Symptom Inventory – Anxiety        | Yes                  | 94 | 17.0        | 10.0               | 2.0 – 52.0   | 0.50                                     |
|                                                     | No                   | 42 | 16.4        | 13.2               | 0.0 – 54.0   |                                          |
| Repetitive Behavior Scale – Revised                 | Yes                  | 94 | 27.7        | 21.9               | 2.0 – 99.0   | 0.20                                     |
|                                                     | No                   | 42 | 29.1        | 21.8               | 1.0 – 74.0   |                                          |
| Social Responsiveness Scale 2                       | Yes                  | 94 | 74.7        | 12.0               | 48.0 – 105.0 | 0.46                                     |
|                                                     | No                   | 42 | 74.4        | 8.8                | 56.0 – 91.0  |                                          |
| Kaufman Brief Intelligence Test-2                   | Yes                  | 94 | 100.3       | 19.2               | 60.0 – 136.0 | 0.21                                     |
|                                                     | No                   | 42 | 93.5        | 19.2               | 60.0 – 132.0 |                                          |

*The two groups of participants are compared in terms of the overall severity of ASD symptoms, as captured by the total score of a given scale. Cells contain mean, standard deviation and range of the total score for each scale and group of participants separately. n indicates the number of participants in each of the two groups. All reported P-values are two-sided*

**Supplementary Figure 1.** Distributions of % *Valid Time* for each stimulus condition and group of participants separately.

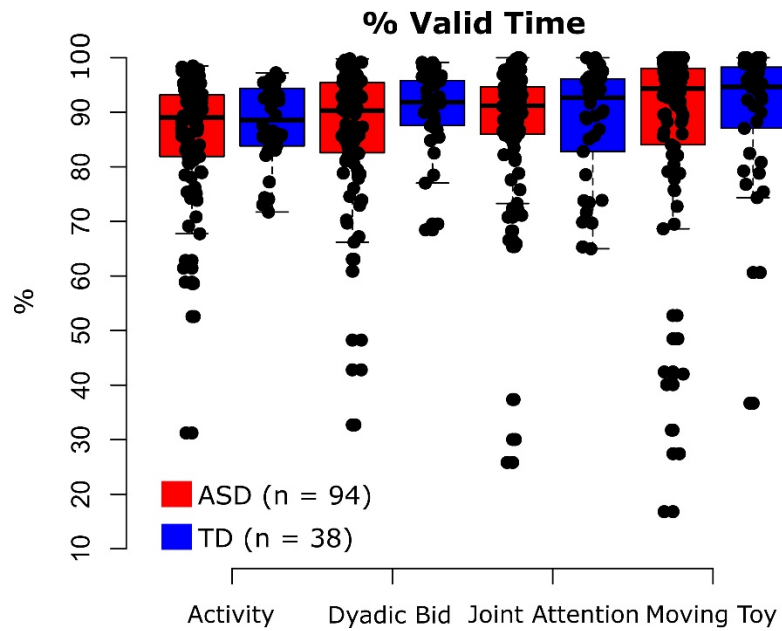

The data are summarized in a form of boxplots. Black dots denote individual participants. The data of individuals with ASD and TD controls are highlighted in red and blue colors, respectively. 'n' indicates the number of participants. Note that there exist no significant between-group differences in % Valid Time in any of the four stimulus conditions (**Supplementary Table 4**). ASD, autism spectrum disorder; TD, typically developing



**Supplementary Figure 2.** Significant relationships between % *Valid Time*, % *looking time* and the KBIT-2 IQ composite score.

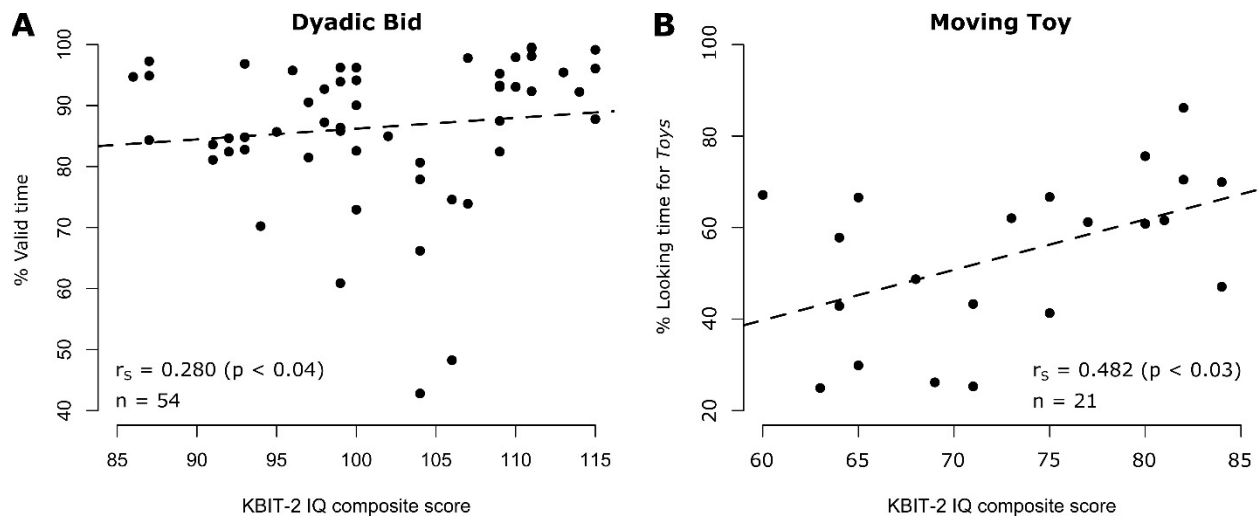

A, Scatter plot between % Valid Time in the condition Dyadic Bid and the KBIT-2 IQ composite score in the group of individuals with ASD with average IQ (range: 85–115). B, Scatter plot between % *looking time* for Toys in the condition Moving Toy and the KBIT-2 IQ composite score in the group of individuals with ASD with low IQ (range: 60–84). Black dots in each panel indicate individual participants. The dashed line in each panel represent the best linear fit of the presented data.  $r_s$  and  $p$  in each panel correspond to a Spearman correlation coefficient and the corresponding two-sided *P-value* obtained for the presented data (**Supplementary Table 9**). ‘ $n$ ’ indicates the number of participants. ASD, autism spectrum disorder; IQ, intelligence quotient; KBIT-2, Kaufman Brief Intelligence Test-
